# Supplementary material
Source: publisher figshare collection journal article supplement (https://sage.figshare.com/ndownloader/files/22011459)
Supplement: Supplementary file 1 [file 22011459]

| Grasses | Weeds | Trees | Mites | Epithelials | Insects | Fungi |
| --- | --- | --- | --- | --- | --- | --- |
| - June grass (Kentucky Blue) - Meadow Fescue grass - Orchard grass - Perennial Rye grass - Red Top grass (Bent) - Timothy grass - Sweet Vernal grass - Brome grass - Oat pollen - Johnson grass - Bahia grass - Corn pollen - Bermuda grass | - Lamb’s Quarters - Kochia - Russian Thistle - Saltbush, Annual - Ragweed Mix (Short, Tall) - Ragweed, False - Ragweed, Southern - Ragweed, Western - Sage, Mugwort Mix - Cocklebur - Marsh Elder, Burweed - Marsh Elder, Rough - Goldenrod - Dog Fennel - Sorrel, Dock Mix - English Plantain - Pigweed Mix -Nettle | - Maple, Box Elder Mix - Oak Mix - Beech - Mulberry - Hickory - Pecan - Walnut, Black - Walnut, California Black - Willow - Aspen - Cottonwood - Ash, American/White - Ash, Arizona - Olive - Privet - Cedar - Cypress, Arizona - Cypress, Bald - Elm Mix - Alder - Birch Mix - Hazelnut - Sycamore - Acacia - Mesquite - Sweetgum - Bayberry - Pepper Tree - Pine Mix - Palm, Queen - Eucalyptus - Melaleuca - Pine, Australian | - Dermatophagoides farinae dust mite - Dermatophagoides pteronyssinus dust mite - Tyrophagus storage mite - Acarus siro storage mite - Lepidoglyphus storage mite - Blomia tropicalis mite | - Dog - Feather Mix | - Flea - Cockroach Mix - Mosquito | - Malassezia - Fusarium - Aspergillus - Penicillum - Cladosporium - Alternaria - Drechslera - Grain Smut Mix |

Supplementary Table Figure legend: All cats in this study had allergen panels run based on zip code of residence. While cats were from different parts of the state, they were geographically similar enough to have the identical sets of allergens within their panels.
